# Supplementary material for: T-Cell Defects Associated to Lack of Spike-Specific Antibodies after BNT162b2 Full Immunization Followed by a Booster Dose in Patients with Common Variable Immune Deficiencies
Source: MDPI journal article supplement (doi:10.3390/cells11121918), 2022-06-14
Supplement: s1 [file s1]

**Table S1.** SARS-CoV-2 infection in CVID patients immunized with three doses of BNT162b2 vaccine

| Group        | ID | days from booster dose | COVID-19 treatment       | Days of qRT PCR positivity | Severity     |
|--------------|----|------------------------|--------------------------|----------------------------|--------------|
| NR           | 1  | 88                     | Bamlanivimab/etes evimab | 24                         | mild         |
|              | 3  | 157                    | Sotrovimab               | 8                          | mild         |
|              | 4  | 176                    | Sotrovimab               | 45                         | mild         |
|              | 6  | 95                     | Sotrovimab               | 41                         | mild         |
|              | 10 | 117                    | Sotrovimab               | 37                         | asymptomatic |
|              | 14 | 195                    | Paxlovid                 | 14                         | mild         |
|              | 15 | 116                    | Sotrovimab               | 25                         | mild         |
|              | 17 | 150                    | Paxlovid                 | 7                          | mild         |
| S1 IgG-R     | 20 | 121                    | Sotrovimab               | 26                         | mild         |
|              | 26 | 87                     | No treatment             | 8                          | asymptomatic |
|              | 27 | 88                     | Sotrovimab               | 26                         | mild         |
|              | 34 | 183                    | Sotrovimab               | 9                          | mild         |
| S1 IgG/IgA-R | 37 | 101                    | Sotrovimab               | 14                         | mild         |
|              | 38 | 130                    | Sotrovimab               | 11                         | mild         |
|              | 42 | 117                    | Sotrovimab               | 16                         | mild         |
